1 **Title:** Crystal structure of calcium bound outer membrane phospholipase A (OmpLA) from  
2 *Salmonella typhi* and *in silico* anti-microbial screening.

3

4 Perumal Perumal<sup>1,2†</sup>, Rahul Raina<sup>1†</sup>, Sundara Baalaji Narayanan<sup>2</sup>, and Arulandu  
5 Arockiasamy<sup>1\*</sup>

6

7 <sup>1</sup>Membrane Protein Biology Group, International Centre for Genetic Engineering and  
8 Biotechnology, Aruna Asaf Ali Marg, New Delhi 110067. India.

9 <sup>2</sup>Department of Bioinformatics, Bharathiar University, Coimbatore-641046. India.

10

11 <sup>†</sup>These authors contributed equally

12 \*Correspondence should be addressed to: [sam@icgeb.res.in](mailto:sam@icgeb.res.in)

13 **Communicating author:**

14 Arockiasamy Arulandu

15 Membrane Protein Biology Group, International Centre for Genetic Engineering and

16 Biotechnology (ICGEB),

17 Aruna Asaf Ali Marg,

18 New Delhi 110067. India.

19 Phone: +91-11-26741358 Ext-172

20 Mobile: +91-9711055502

21 Fax: +91-11-26742316

22 E-mail: [sam@icgeb.res.in](mailto:sam@icgeb.res.in) / [asamy001@gmail.com](mailto:asamy001@gmail.com)

23

24 **Abstract**

25 Antimicrobial resistance is widespread in *Salmonella* infections that affect millions  
26 worldwide. *Salmonella typhi* and other Gram-negative bacterial pathogens encode an outer  
27 membrane phospholipase A (OmpLA), crucial for their membrane integrity. Further, OmpLA  
28 is implicated in pathogen internalization, haemolysis, acid tolerance, virulence and sustained  
29 infection in human hosts. OmpLA is an attractive drug target for developing novel anti-  
30 microbials that attenuate virulence, as the abrogation of OmpLA encoding *pldA* gene causes  
31 loss of virulence. Here, we present the crystal structure of *Salmonella typhi* OmpLA in  
32 dimeric calcium bound activated state at 2.95 Å. Structure analysis suggests that OmpLA is a  
33 potential druggable target. Further, we have identified and shortlisted small molecules that  
34 bind at the dimer interface using structure based *in silico* screening, docking and molecular  
35 dynamics. While it requires further experimental validation, anti-microbial discovery  
36 targeting OmpLA from gram-negative pathogens offers an advantage as OmpLA is required  
37 for virulence.

38

39 **Keywords:** Outer membrane phospholipase A (OmpLA), OmpLA, *Salmonella typhi*, crystal  
40 structure, antibiotic resistance, antimicrobial design

41

42

43

44

## 45 Introduction

46 *Salmonella typhi*, a human pathogen, causes typhoid fever that affects ~ 21 million people  
47 every year (WHO, Fact sheet 2018). Existing therapies include various antibiotics, misuse of  
48 which results in rampant antimicrobial resistance. The problem of emergence of resistant  
49 strains, in part, is due to antibiotics targeting essential genes and pathways. Thus, virulence  
50 causing factors are an attractive and alternate molecular target to design novel anti-  
51 microbials. Bacterial outer membrane proteins are involved in signal transduction and  
52 transport of nutrients with few acting as enzymes, one of which is outer membrane  
53 phospholipase A (OmpLA) encoded by *pldA*. OmpLA encoding *pldA* from *Escherichia coli*,  
54 *Salmonella typhimurium*, *Klebsiella pneumoniae*, and *Proteus Vulgaris* were extensively  
55 explored for its function<sup>1,2</sup>. OmpLA is a highly conserved protein essential for bacterial  
56 membrane integrity and is present in all members of the Enterobacteriaceae family. OmpLA  
57 shows enzymatic activity similar to those of soluble phospholipases A1 and A2 as well as  
58 that of 1-acyl- and 2-acyl-lysophospholipase and diacylglyceride lipase<sup>3</sup>. *E. coli* OmpLA  
59 (EcOmpLA) is shown to play key role during secretion of bacteriocins<sup>4,5</sup>. Though  
60 functionally inactive during normal growth phase<sup>6</sup>, OmpLA shows increased enzymatic  
61 activity during membrane damage, triggered by phage-mediated lysis<sup>7</sup> or temperature shock<sup>8</sup>.  
62 OmpLA mutant of *Shigella flexneri* shows altered expression of membrane-integrated  
63 proteins and affects expression of ABC transporters and type III secretion system function<sup>9</sup>.  
64 Further, OmpLA is also implicated in various bacterial pathologies such as massive tissue  
65 destruction related to gas gangrene, sepsis, skin and lung infections<sup>10</sup>. Thus, the existing data  
66 strongly suggests OmpLA is not essential for growth but is a major virulence factor and  
67 hence a potential drug target. Interestingly, bacterial OmpLA shows no sequence or structural  
68 homology with soluble phospholipases in human, indicative of its usefulness as a unique drug  
69 target.

70

## 71 **Results and discussion**

### 72 **Structure determination of *S. typhi* OmpLA**

73 *S. typhi* OmpLA (StOmpLA), cloned without the signal sequence (Fig. S1a, b), was  
74 overexpressed in *E. coli* as inclusion bodies. Scouting urea concentration for unfolding  
75 OmpLA shows sharp rise in absorption at OD<sub>280</sub> at 4 M which stabilizes at 6 M (Fig. S1c, d).  
76 Large-scale unfolding was done using 8 M urea, and refolding was achieved in presence of  
77 0.3% Polyoxyethylene (9) lauryl ether (C<sub>12</sub>E<sub>9</sub>). Refolded OmpLA was further purified using  
78 ion-exchange and size exclusion chromatography (Fig. S1e, f) and concentrated to 14 mg/ml.  
79 Then the protein was detergent exchanged from C<sub>12</sub>E<sub>9</sub> to  $\beta$ -octyl-glucoside ( $\beta$ -OG) using an  
80 ion-exchange column, concentrated to 14 mg/ml, flash frozen in liquid nitrogen and stored at  
81 -80 °C before crystallization. Total yield of refolded and detergent exchanged OmpLA was  
82 15 mg/gm of purified inclusion bodies. Circular dichroism (CD) data (Fig. S1g), using a 240  
83 to 205 nm scan, shows minimum mean residue molecular ellipticity [ $\Theta$ ] (MRW) around 217  
84 nm and a crossover at 210 nm, indicating refolded OmpLA contains mainly of  $\beta$ -structure,  
85 similar to EcOmpLA<sup>11,12,13</sup>. Protocol described here (Methods) yields more refolded OmpLA  
86 than previously published methods<sup>14,15</sup>. Refolded OmpLA was crystallized in various  
87 conditions using MemGold 1 and 2. Diffraction quality crystals (Fig. S1h) were obtained in a  
88 condition containing 0.1 M sodium iodide, 0.1 M sodium phosphate (pH 7.0), and 33% v/v  
89 polyethylene glycol 300. StOmpLA crystals were directly mounted on home source X-ray  
90 and screened for diffraction quality. A single crystal diffracted to 2.95 Å resolution,  
91 belonging to the space group P2<sub>1</sub>2<sub>1</sub>2<sub>1</sub> with the unit cell parameters; a=79.340Å, b=83.389Å,  
92 c=95.463Å and  $\alpha = \beta = \gamma = 90^\circ$ . Mathew's coefficient calculation suggested 48.63% solvent  
93 content and a V<sub>m</sub> of 2.39 Å<sup>3</sup>/Dalton, indicating two molecules are present in the asymmetric  
94 unit. Molecular replacement using EcOmpLA (PDB: 1QD6) as template structure yielded

95 initial phases. StOmpLA model was built, using COOT<sup>16</sup>, and refined to a final R and R<sub>free</sub> of  
96 23.8 and 28.9 (Table 1), and deposited to the Protein Data Bank with accession code 5DQX.

97

### 98 **Crystal structure of calcium bound *S. typhi* OmpLA dimer**

99 StOmpLA is crystallized as a calcium bound homodimer with each monomer forming a  $\beta$ -  
100 barrel, containing two flat surfaces, facing the membrane bilayer, and two highly convex  
101 sides (Fig. 1a, b); one facing the periplasm and the other towards cytoplasm, respectively.  
102 Each  $\beta$ -barrel is comprised of 13 anti-parallel  $\beta$ -strands ( $\beta 1 - \beta 13$ ), an  $\alpha$ -helix ( $\alpha 1$ ) (between  
103  $\beta 8$  and  $\beta 9$ ) and three  $3_{10}$  helices ( $\eta 1 - \eta 3$ ) with  $\eta 1/\eta 2$  located between  $\beta 2$  and  $\beta 3$ , and  $\eta 3$   
104 located between  $\beta 4$  and  $\beta 5$ .  $3_{10}$  helices  $\eta 1$  and  $\eta 2$  form a helix-turn-helix motif towards the  
105 extracellular end of the  $\beta$ -barrel (Fig. 1c). The structure has 18 turns containing 2  $\alpha$ -turns  
106 (TTT), 8  $\beta$ -turns (TT) and 8 long loops facing polar compartments. The loops between  $\beta$ -  
107 strands  $\beta 2$  and  $\beta 3$ ,  $\beta 12$  and  $\beta 13$  along with  $\eta 1/\eta 2$  helix-turn-helix motif constrict the opening  
108 of barrel towards extracellular space, and N- and C-terminal loops cover the periplasmic ends  
109 of  $\beta$ -barrel (Fig. 1c). Temperature factor (B-factor) ranges between 16 to 74  $\text{\AA}^2$  with an  
110 average value of 29.36  $\text{\AA}^2$ . The loop region preceding  $\beta 1$  strand, has a high B-factor (D46: 77  
111  $\text{\AA}^2$ , N47: 73  $\text{\AA}^2$ , P48: 70  $\text{\AA}^2$ ) as shown in Figure 1d, e. The differences in B-factor of  
112 individual residues in each chain as shown in Figure 1e are not significant. Each monomer  
113 has two highly ordered aromatic belts (Fig. 2); one near extracellular space of the  $\beta$ -barrel  
114 and another near periplasmic space. Interaction between Y211 and Y272 brings loop 17  
115 closer to the  $\beta$ -barrel thereby constricting the pore size (Fig. 2a). There are two sulphur- $\pi$   
116 pairs, present towards the interior of OmpLA channel formed by the residues M284 & W258  
117 (4.5  $\text{\AA}$ ), and M212 & W175 (6.0  $\text{\AA}$ ) as shown in Figure 2b,c, help stabilize  $\beta 13$ ,  $\alpha 1$ , L12 and  
118 L13 with respect to the barrel, and thereby further constricting the channel opening towards  
119 the extracellular compartment. Superposition of StOmpLA monomers on C $\alpha$  atoms shows

120 RMSD of 0.096Å, suggesting no major structural differences between them. The minor  
121 differences observed are mainly confined to loops; L1 (Glu45-Thr51), L9 (Phe148-Trp151),  
122 L16 (Pro249 – Leu254) and residues in  $\beta$ 5 strand (Fig. S2a), exposed to the periplasmic  
123 region. Loop 1 (70 Å<sup>2</sup>) and 9 (52 Å<sup>2</sup>) have a higher b-factor in comparison with the average  
124 b-factor of 29.3 Å<sup>2</sup> (Fig. S2b).

125

126 Crystal structure of StOmpLA has clear electron density in the region covering Q44 to T51 in  
127 both monomers, whereas density is missing for the corresponding region of EcOmpLA  
128 structure (E25 to F30). Totally 20 water molecules were modelled. We modelled two Ca<sup>2+</sup>  
129 ions and one  $\beta$ -OG (n-Octyl- $\beta$ -D-Glucopyranoside), used in crystallization buffer, using  
130 difference Fourier (Fo-Fc) densities. There is presence of only one  $\beta$ -OG detergent molecule  
131 in chain B towards the extracellular side of OmpLA with strong electron density for head  
132 region only, and each chain has 4 glycerol molecules (Fig. S3). Chain A has a total of 8 water  
133 molecules with 2 water molecules inside chain A channel while chain B has a total of 10  
134 water molecules with 4 inside chain B channel (Fig. S3). Whether these channels are  
135 involved in transport of any solute is not known at present.  $\beta$ -OG was used in the final  
136 purification step while glycerol was present in the refolding and final elution buffers.

137

138 StOmpLA homodimer is stabilized by two calcium bridges. The calcium coordination in  
139 these two bridges have octahedral geometry for calcium bound to Ser126(O) of chain A with  
140 Arg167(O) and Ser172(OG) of chain B (50% vacancy)<sup>17</sup>, and trigonal bipyramidal geometry  
141 for calcium bridge with Ser126(O) of chain B, Arg167(O) and Ser172(OG) of chain A (40%  
142 vacancy)<sup>17</sup>. The low resolution of the StOmpLA may be the reason for absence of density for  
143 coordinating water molecules. Fo-Fc difference map, contoured at 3 $\sigma$ , shows electron density  
144 for two calcium ions bound at the dimer interface (Fig. 1b). Calcium binding is known to

145 induce and stabilize the functional dimer formation of OmpLA. However, in *E. coli* OmpLA  
146 (1QD6) the first calcium is bound by octahedral geometry through C/S152, C/R147, D/S106  
147 along with three water molecules (no vacancy). The second calcium is coordinated by  
148 trigonal bipyramidal geometry through C/S106, D/R147, D/S152 along with D/H<sub>2</sub>O302 (20%  
149 vacancy)<sup>15</sup>.

150

### 151 **Aromatic belts, dimer interface and crystal packing of StOmpLA**

152 Each OmpLA monomer contains two aromatic belts around the  $\beta$ -barrel, separated by a  
153 distance of 22 to 26 Å on either side of the membrane which is very close to the average  
154 bacterial outer membrane thickness (Fig. 2d). The aromatic amino acids help anchor into  
155 membrane and stabilize the protein<sup>18,19</sup>. Aromatic side chains in these belts are in two major  
156 conformations; side chains towards the inner side of aromatic belts, located in the  
157 hydrophobic environment of detergent solubilized protein, are oriented away from polar  
158 solute, along the membrane plane, while the aromatic rings, particularly tyrosine with  
159 hydroxyl groups, located at the detergent-polar solvent interface are oriented towards the  
160 polar lipid head-solvent interface<sup>20</sup> as seen in Figure 2d. Aromatic  $\pi$ - $\pi$  interactions are  
161 implicated in the stability and self-assembly processes in proteins<sup>20</sup>. Three aromatic  $\pi$ - $\pi$   
162 interactions are noted between F129 and W118 (4.8 Å), Y134 and Y112 (6.87 Å), Y221 and  
163 W189 (4.60 Å). There are 12 tyrosine, 4 tryptophan and 6 phenylalanine residues marking the  
164 aromatic belt with a predominance of tyrosine residues. These Tyrosine residues contribute to  
165 the stability of OmpLA embedded in the outer membrane.

166

167 The dimer has a buried surface of 1429 Å<sup>2</sup> which occludes 31% of the total solvent accessible  
168 area (PDBePISA)<sup>21</sup>. The dimer interface is also stabilized by the presence of 13 hydrogen  
169 bonds, 5 aromatic ring interactions and three hydrophobic patches as shown in Figure 3. The

170 following hydrogen bonds are noted between A/N77(OD1): B/S168(OG) (3.7Å),  
171 A/N77(ND2): B/S168(OG) (3.3Å), A/S168(OG): B/N77(OD1) (3.3Å), A/S168(OG):  
172 B/N77(ND2) (3.7Å), A/s126(OG): B/D169(OD1) (2.8Å), A/S126(O): B/S172(OG) (3.5Å),  
173 A/G166(O): B/F129(N) (3.1Å), A/F129(N): B/G166(O) (2.8Å), A/Q144(OE1):  
174 B/Q144(NE2) (3.3Å), A/Q144(NE2): B/Q144(OE1) (3.2Å), A/P96(O): B/H254(N) (3.3Å),  
175 A/L52(O): B/L52(N) (2.8Å) and A/L52(N): B/L52(O) (2.8Å) residues. The hydrogen bond  
176 distribution is skewed with 8 at the extracellular end, 2 at the centre and 3 at the periplasmic  
177 end of dimer. Of the 8 hydrogen bonds at the extracellular side of the  $\beta$ -barrel, 6  
178 (A/N77(OD1): B/S168(OG), A/N77(ND2): B/S168(OG), A/S168(OG): B/N77(OD1),  
179 A/S168(OG): B/N77(ND2), A/s126(OG): B/D169(OD1) and A/S126(O): B/S172(OG)) are  
180 positioned in polar non-membrane-embedded region of the protein dimer. The aromatic  
181 interactions which stabilize the dimer include A/Y134: B/F129 (4.0Å), A/F129: B/Y134  
182 (4.1Å), A/Y112: B/F89 (5.8Å), A/F89: B/Y112 (6.0Å) and A/Y53: B/H254 (5.9Å). The first  
183 four pairs of aromatic ring interactions are located in the centre of the dimer interface  
184 whereas the last interaction is located at the periplasmic end of the protein molecule. Figure 3  
185 insets show these interactions with distances shown between the aromatic ring centroids.  
186 Three hydrophobic patches are formed towards the extracellular end, centre and periplasmic  
187 end of the  $\beta$ -barrel dimer as shown by the insets on right side of Figure 3. The extracellular  
188 patch consists of E125(A), W78(A), R167(A), S172(A), P128(A), S126(A), E125(B),  
189 W78(B), R167(B), S172(B), P128(B) and S126(B). The hydrophobic patch in the middle of  
190 dimer interface contains Y134(A), Y134(B), L91(A), L91(B), Y112(A) and Y112(B)  
191 whereas the patch towards the periplasmic end has L97(A), F95(A), Y53(A), P54(A),  
192 T51(A), L285(A), V255(A), T252(A), V255(B), L91(B), T51(B), P54(B), L93(B), F95(B),  
193 P96(B) and L97(B).

194



195 Crystals of OmpLA show typical type II packing<sup>22</sup> wherein the detergent molecules shield  
196 hydrophobic transmembrane regions allowing crystal contacts to form through polar extra-  
197 membranous regions including loops and helices on both sides. The crystal contacts in  
198 OmpLA are shown in Figure S4 where the residues involved in crystal contacts are shown in  
199 all three planes. XY plane shows the alternate stacking orientation of OmpLA dimers in  
200 crystal. YZ plane clearly show the two regions of contact involving both highly convex sides  
201 of the protein. Two hydrophobic patches are formed by V281(A), V251(B'), Y62(A) and  
202 L257(B') (Region I) as well as N176(B'), L178(B'), M158(A) and G103(A) (Region II).  
203 Region II also has a hydrogen bond between S201(B') and L102(A) (3.22 Å). XZ plane also  
204 shows the presence of two more regions which help in crystal formation. Region III is formed  
205 by L70(A), E71(A), D67(A), N275(A), Y265(A), Y240(A), P206(B'''), K210(B''') and  
206 N237(B''') while region IV mainly involves hydrophobic residues F148(B), A149(A),  
207 R147(B), L223(A'') and G224(A''). Region IV also has a hydrogen bond between  
208 E225(OE)(A'') and amide backbone between F148(B) and A149(A) (2.9Å).

209

### 210 **Comparative analysis of *S. typhi* and *E. coli* OmpLA crystal structures**

211 Structural comparison of StOmpLA monomer using DALI server showed best match with  
212 monomeric EcOmpLA structure (1QD5) with a z-score 39.8 and RMSD of 0.6 Å, while the  
213 dimeric structure of EcOmpLA 1QD6 shows RMSD of 0.36 Å. Both OmpLA proteins share  
214 92% sequence identity, and the most variations are seen in the loops exposed to the  
215 extracellular space, turns facing cytoplasm and in all three 3<sub>10</sub> helices (Fig. 4a b). Thus, the  
216 overall barrel topology and architecture of OmpLA from other Gram -negative human  
217 pathogens is expected to be conserved (Fig. 4b) including that of *S. flexneri*, mutation of  
218 which severely compromises type III secretion. The segment that comprises of residues 17 to  
219 24 and 248 to 252 is α-helical in EcOmpLA but is as a loop in *S. typhi* OmpLA (Fig. 4a).

220 Likewise, the segment comprising amino acid residues 70-74 in EcOmpLA is a loop but the  
221 corresponding segment is  $\alpha$ -helical in *S. typhi* OmpLA though the sequences and positions  
222 are strictly conserved. Comparison of the monomeric and dimeric forms points to two very  
223 interesting changes: 1) monomeric OmpLA has two  $\beta$ -strands instead of one continuous  $\beta$ 8-  
224 strand in *S. typhi* OmpLA and 2) the end of the  $\beta$ -strand has a very high b-factor asparagine  
225 (N181, 92.7 Å<sup>2</sup>) residue in 1QD5. The average b-factor for the loop and helix between  $\beta$ 8 and  
226  $\beta$ 9 is also higher in monomeric forms in comparison to dimeric form of OmpLA. Moreover,  
227 the b-factor also varies with monomeric form having higher overall temperature factor when  
228 compared to dimeric form and distinctly higher B-factor in the extracellular helical regions  
229 (Fig. 4a). Also, there is a gradation in B-factor from 1QD5 > 1QD6 > 5DQX. The *S. typhi*  
230 OmpLA (5DQX – this study) shows a very low b-factor while as the EcOmpLA show higher  
231 average temperature factor.

232

### 233 **Calcium induced structural stability of StOmpLA**

234 To assess the role of calcium in the stability and dynamics of StOmpLA, a 100 nanosecond  
235 molecular dynamics simulation (Desmond, Schrodinger suite) was performed with and  
236 without Ca<sup>2+</sup>. The RMSD plot shows that OmpLA with Ca<sup>2+</sup> stabilizes faster than the protein  
237 without Ca<sup>2+</sup>, albeit at a higher RMSD value. RMSD trajectory for OmpLA without Ca<sup>2+</sup>  
238 stabilize towards the end of 60 ns and overlaps the native OmpLA trajectory (Fig. 5a). Most  
239 of the RMSD fluctuations were seen in the loop regions as marked by the red boxes (Fig. 5b)  
240 with loop lengths having no bearing on the RMSF values as seen for loop regions L3, L4 and  
241 L5 (Fig. 1c). The Ca<sup>2+</sup> binding residues Ser126/A along with Ser167/B and Arg172/B show  
242 higher RMSF compared to second calcium binding residues, Ser126/B, Ser167/A and  
243 Arg172/A, clearly visible in box III and VI. Higher RMSF of Ca<sup>2+</sup> binding residues were  
244 observed in an earlier study as well<sup>23</sup>. The higher RMSF in Ca<sup>2+</sup> minus state shown in boxes I

245 and IV can be explained by absence of calcium coordinated water mediated hydrogen  
246 bonding network as well as weakening of hydrogen bonding involving 4 out of 6 hydrogen  
247 bonds on the extracellular side of  $\beta$ -barrel namely A/N77(OD1): B/S168(OG), A/N77(ND2):  
248 B/S168(OG), A/S168(OG): B/N77(OD1), A/S168(OG): B/N77(ND2). Overall, the dynamics  
249 analysis suggests that calcium bound dimer is stable compare to the unbound structure. The  
250 dimeric structure of StOmpLA with bound calcium was further used as a template for  
251 following *in silico* study.

252

### 253 ***In silico* structure-based anti-microbial discovery targeting StOmpLA**

254 To target StOmpLA with small molecular inhibitors, a thorough structural analysis of binding  
255 pockets was done using the SiteMap module of Schrodinger suite, which predicts druggable  
256 pockets, based on size, shape and chemical features (Table S1). The top ranked site (site-1) is  
257 found at the dimer interface, facing the extracellular side of (Fig. 6a, b), and contains the  
258 following residues from both chains A & B: 75-78, 128-132,134, 165 -171. Site-1 is exposed  
259 to solvent from the extracellular side of bacterial outer membrane. Thus, further *in silico*  
260 screening was carried out targeting site-1 using a set of synthetic compounds,  
261 phytochemicals, NCI and FDA approved drug database compounds. Potent binders were  
262 identified and short-listed based on the G-score (Schrodinger: Glide) and number of hydrogen  
263 bonds and hydrophobic interactions within the predicted site. Compounds with Glide scores  
264 ranging from -13.2 to -9.8 are listed in Table S2. Site-2, located right beneath site-1 in each  
265 monomer, spans the buried interior space between the two monomers where the native  
266 membrane lipid substrate is expected to bind. This is evident from the complex crystal  
267 structure of EcOmpLA with covalently bound inhibitor hexadecanesulfonyl fluoride  
268 (HDSF)<sup>24</sup>. Binding of two molecules of HDSF at the largely hydrophobic dimer interface  
269 suggest that this site can accommodate two molecules of hydrophobic inhibitor targeted to

270 bind at the buried dimer interface, though bioavailability and toxicity such molecule remains  
271 to be tested experimentally at the context of known HSDF toxicity. Site-3 and Site-4 are  
272 equivalent sites present inside the interior channel-like opening of each monomer, closer to  
273 the middle of the barrel height. Site-5 spans the both monomers from the periplasmic space  
274 side and is considered less druggable (not shown).

275

276 The top ranked *in silico* hits binding to site-1; NCI97317, Alanylthreonine and Phloretin were  
277 further explored for structural stability using molecular dynamics using 100ns simulations.  
278 RMSD values of the protein-ligand systems were compared with reference to the initial  
279 protein structure. The RMSD time course trajectories for four complexes are shown with  
280 native OmpLA dimer as the control in Figure 7. The initial fluctuating RMSD trajectories  
281 approached stable values towards the end of 100 ns MD simulations, indicating equilibrated  
282 protein-ligand complexes, suitable for various analysis. The RMSD values were found to be  
283 lower in OmpLA-small molecule complexes. Variations of RMSD, in comparison to native  
284 protein, along with representative hydrogen bonding pattern in the stable trajectory region, as  
285 insets, are shown in Figure 7. OmpLA-NCI97317 complex showed the least variation in  
286 RMSD among the four complexes analysed. The complex is stabilized by three water  
287 mediated hydrogen bonds from A/F129, B/W78 and B/F129 along with two hydrogen bonds  
288 with A/W78 (Fig. 7). OmpLA-alanylthreonine complex is stabilized by 5 hydrogen bonds  
289 from B/N77, B/T75 and B/Y76 whereas OmpLA-phloretin complex is stabilized by 4  
290 hydrogen bonds with A/Y134, A/N165, A/R167 and B/Y76. OmpLA-sulphamethoxazole  
291 complex is stabilized by 5 hydrogen bonds with A/R167, B/Y76, B/E131 and B/N 165 along  
292 with one water mediated hydrogen bond with A/F129. Among all the complexes, the RMSD  
293 values for OmpLA-alanylthreonine complex has higher fluctuation values ranging between  
294 1.12 and 2.0 Å. The other three inhibitor complexes have RMSD values varying between 1.4

295 and 1.8 Å. The RMSF values, for all the protein-inhibitor complexes, stabilize for the  
296 extracellular part of barrel covering region between loops L3 and L5 marked by red box (Fig.  
297 S5). OmpLA/inhibitor complex interactions, categorized into hydrogen bonds, ionic,  
298 hydrophobic and water bridges, and monitored throughout the 100ns simulation are shown in  
299 Figure S6. Residues with values more than 1 make multiple contacts with these potential  
300 binders. A detailed 2D representation of an elaborate interaction pattern for more than 30%-  
301 time occupancy during the entire 100ns simulation is shown in Figure S7. These results  
302 clearly indicate the structural stability of docked complexes and further suggest that  
303 StOmpLA is druggable. Further experimental validation, using OmpLA enzyme inhibition  
304 assay *in vitro*<sup>24</sup>, will help design unique inhibitors of StOmpLA.

305

## 306 **Summary**

307 The crystal structure of calcium bound StOmpLA was determined to the resolution 2.95 Å.  
308 The functional dimeric structure was used as a template to screen potential small molecule  
309 binders that target the top ranked druggable pocket in the dimer interface of StOmpLA.  
310 Docked complexes of top three hits; NCI97317, Alanylthreonine and Phloretin from 14 short-  
311 listed compounds were assessed for structural stability using 100 ns molecular dynamics  
312 simulations. The data presented here provides a framework for further experimental  
313 validation that will help develop therapeutics specifically targeting virulence causing  
314 mechanism of Gram -negative pathogens, encoding OmpLA. This approach may help address  
315 the growing problem of antibiotic resistance.

316

## 317 **Methods**

### 318 **Cloning of StOmpLA encoding *pldA* gene**

319 810 bp long *pldA* gene, encoding leaderless StOmpLA (21Q-289F) was PCR amplified using  
320 *S. typhi* Ty21a genomic DNA as a template, with an annealing temperature gradient of 48°C  
321 to 52°C. PCR primers used were; forward- 5'GCCATATGCAAGAAGCTACGATAAAAAG  
322 3', reverse-5'GCGGATCCTCAGAAGATATCGTTAAG3'. Maximum amplification was  
323 observed at 50°C annealing temperature (Fig. S1a) and cloned between *NdeI* and *BamHI*  
324 restriction sites into the pET-30b vector, after restriction digestion and ligation. Ligation  
325 mixer was used to transform DH5α cells and positive clones were identified by colony PCR,  
326 confirmed by restriction digestion with *NdeI* and *BamHI* enzymes (Fig. S1b), and followed  
327 by DNA sequencing.

328

### 329 **Overexpression, refolding and purification of StOmpLA**

330 *E. coli* T7 Express/I<sup>q</sup> cells were used for overexpression. Single colony was inoculated and  
331 grown overnight at 37°C in Luria Bertani (LB) (Himedia Labs), supplemented with 30μg/ml  
332 kanamycin. 1% of the overnight grown cells were subcultured and induced at 37°C for 16  
333 hours in 1 L of LB-AIM (LB Auto Induction Media). Cells were harvested by centrifugation  
334 at 4500g for 20 min at 4°C and stored at -20°C. The signal peptideless StOmpLA was seen in  
335 the inclusion bodies (IBs), similar to other overexpressed outer membrane proteins without  
336 signal peptide. Cell pellet was resuspended in 50 mM Tris HCl (pH 8.0) and sonicated at  
337 80Hz for 20 minutes with cycles of 3 seconds ON and 9 seconds OFF. Cell lysate was  
338 centrifuged at 10000 rpm (rotor # 3335, Heraeus) for 7 min at 20°C to collect inclusion bodies  
339 (IBs), unlysed cells and cell debris. IBs were washed three times with a buffer containing 25  
340 mM Tris HCl (pH 8.3), 0.1 M NaCl and 2% Triton X-100, and 2 M urea, followed by two  
341 washes using the buffer containing 25 mM Tris-Cl (pH 8.3) and 0.1 M NaCl. At each step,  
342 IBs were resuspended using Dounce homogenizer and then kept on rotary shaker at 37°C for

343 15 minutes followed by centrifugation at 7,000 rpm (rotor # 3335, Heraus) for 7 minutes at  
344 20°C. Typical yield of purified inclusion bodies were 1 gram per litre of culture.

345

### 346 **Unfolding, refolding and purification of StOmpLA**

347 Purified IBs were solubilized in Tris-HCl buffer containing varying concentrations of Urea to  
348 choose the final concentration for unfolding. Final, large-scale unfolding was carried out in  
349 the buffer containing 25 mM Tris HCl (pH 8.3), 0.1 M NaCl and 8 M urea for 3 hours at  
350 37°C, with moderate shaking<sup>25</sup>. Unfolded OmpLA was centrifuged at 13,000 rpm (rotor #  
351 3335, Heraus) for 45 minutes at 25°C followed by passing through 0.45  $\mu$ m filter to remove  
352 particulate matters. Refolding was done by slow (drop by drop) dilution into 10-fold volume  
353 of refolding buffer containing 25 mM Tris HCl (pH 8.3), 0.1 M NaCl, 10% (v/v) glycerol and  
354 0.3% C<sub>12</sub>E<sub>9</sub> (Sigma), at a flow rate of ~ 25ml/h at 20°C for 16 hours with moderate stirring to  
355 ensure maximum refolding<sup>25</sup>. The diluted and refolded protein was concentrated to 20 ml  
356 using ultrafiltration Amicon stirred cell (Millipore) attached with a 10 kDa MWCO  
357 membrane (Stirred cell and Centriprep-10), and centrifuged at 13,000 rpm (rotor #,FA-45-30-  
358 11, Eppendorf) for 45 minutes at 20°C to remove small aggregates and particulate matter.

359

360 Refolded OmpLA was diluted 10-fold into a buffer containing 25 mM Tris HCl (pH 8.3) and  
361 0.3% C<sub>12</sub>E<sub>9</sub>, and loaded onto a 5ml HiTrap Q-HP anion-exchange column (GE). Column  
362 equilibration and washing, after sample loading, was done using 25 mM Tris HCl (pH 8.3),  
363 10 mM NaCl and 0.3% C<sub>12</sub>E<sub>9</sub>. Bound protein was eluted, in steps, with the same buffer  
364 containing 1 M NaCl and checked on denaturing and reducing SDS-PAGE. Pooled samples  
365 after Q-HP column was concentrated and loaded onto a preparative Superdex 200 10/300  
366 column, attached to an AKTA Explorer (GE), pre-equilibrated with 25 mM Tris HCl (pH  
367 8.3), 0.01 M NaCl and 0.3 % (v/v) C<sub>12</sub>E<sub>9</sub>. The fractions containing pure OmpLA were pooled

368 and further passed through a 1ml HiTrap Q-Sepharose fast flow (GE healthcare) anion-  
369 exchange column equilibrated with the same buffer, at the flow rate of 0.3ml/min. Column  
370 was washed with the wash buffer containing 25 mM Tris HCl (pH 8.3), 10 mM NaCl, and  
371 1%  $\beta$ -OG, on a loop, for 3 hours at 4°C to remove C<sub>12</sub>E<sub>9</sub> and unbound protein. Then, the final  
372 round of column wash done with wash buffer containing 1 %  $\beta$ -OG for overnight. After  
373 detergent exchanged protein was eluted in a single step using Buffer-B containing 25 mM  
374 Tris HCl pH 8.3, 1 M NaCl, 10% glycerol, 1%  $\beta$ -OG. Eluted protein was concentrated and  
375 salt concentration was reduced using Amicon centriprep-10 ultracentrifugal devise. Aliquots  
376 of 40  $\mu$ l of purified protein were flash frozen in liquid nitrogen and stored at -80 °C until  
377 further use.

378

### 379 **Circular dichroism (CD)**

380 CD measurements were performed on a Jasco J-810 spectropolarimeter. For far-UV CD  
381 spectra of secondary structure, samples in 1 mm path length cuvettes were scanned in the  
382 wavelength range 250–190 nm, using a 1 nm nominal bandwidth with three accumulations.  
383 Spectra were corrected for background by subtraction of buffer and detergent blanks.

384

### 385 **Crystallization**

386 OmpLA crystallization trials were carried out using sitting drop with the nanovolume  
387 dispensing robot (Mosquito, TTP Labtech Ltd) and various commercial sparse matrix crystal  
388 screens like JCSG (+), PACT Premier (Molecular Dimensions), Wizard I/II (Emerald  
389 Biosystems), Crystal Screen I/II (Hampton Research), MemGold and MemStart. 300 nl drops  
390 were set up with three (1:1, 1:2, 2:1) ratios of protein to crystallizing buffer and incubated at  
391 293 K/20 °C. A protein concentration of 14mg/ml was used for crystallization. Needle shaped  
392 crystals were obtained after a day in a condition containing 0.2 M calcium chloride, 0.1 M



393 sodium acetate (pH 5.0), 20% w/v PEG 6000 whereas micro-crystals appeared after a day in  
394 a different condition; 0.08 M sodium citrate pH 5.2, 2.2 M ammonium sulphate and 0.64 M  
395 sodium acetate, 18% w/v PEG3350. Crystals were observed under a light microscope  
396 (Olympus). Diffraction quality 3D crystals grew within two days in 0.1 M sodium iodide, 0.1  
397 M sodium phosphate (pH 7.0), and 33% v/v polyethylene glycol 300.

398

### 399 **X-ray diffraction data collection**

400 The crystal was swiftly fished out from the mother liquor using a nylon-fibre loop after  
401 adding 2  $\mu$ l of reservoir solution containing 0.1 M sodium iodide, 0.1 M sodium phosphate  
402 (pH7.0), and 33 % v/v polyethylene glycol 300. X-ray diffraction data was collected to 2.95Å  
403 resolution on an in-house rotating anode X-ray source (Rigaku FR-E+ Super Bright)  
404 connected to R-AXIS IV++ detector at the National Institute of Immunology (NII), New  
405 Delhi, India. A total of 155 images were collected at the wavelength of 1.5418 Å with 2 min  
406 exposure and 1° oscillation per image at 100K.

407

### 408 **Structure determination, refinement and analysis**

409 Data was indexed, integrated and scaled using the HKL-2000 software package<sup>26</sup> and  
410 automated Molecular Replacement was performed using BALBES server<sup>27</sup>. Initial rigid body  
411 and restraint refinements were performed using REFMAC5<sup>28</sup> of CCP4 suite<sup>29</sup> and model was  
412 built using WinCoot0.7.2.1<sup>16</sup>. The final protein model was validated using PROCHECK  
413 module of CCP4 suite. Structure-based multiple sequence alignment was done using the  
414 ESPript server<sup>30</sup>. PyMOL was used for structure visualization, comparison and generating  
415 figures.

416

### 417 **Compounds retrieval from publicly available databases**

418 Compounds with known anti-biotic activity; Ampicillin, Chloramphenicol,  
419 hexadecanesulfonyl fluoride, Kanamycin, ONO-RS-082, Streptomycin, Daptomycin, 8-  
420 Methoxy Fluoroquinolone, aristolochic acid I, Azithromycin, bromoenol lactone,  
421 Ciprofloxacin, Clarithromycin, Clindamycin, Clofazimine, Dapsone, erythromycin,  
422 Ethambutal, Gatifloxacin, Gentamycin, Halopemide, Levofloxacin, Linezolid, Methyl  
423 linolenyl fluorophosphonate, Moxifloxacin, Neomycin, Nitrofuranton, Nortoxacin, Rifabutin,  
424 Rifapentine, Sulfacetamide, telavacin, tigecycline, Trimethoprim, sulfamethazole,  
425 Norfloxacin, Isoniazid and phytochemicals; Allicin, Artemisin, Asiatocoside, Berberine,  
426 Caffeic acid, Capsaicin, Catechin, Chrysin, Cocaine, Coumarin, Ellagitannin, Eugenol,  
427 Fructose, harmane, p-benzoquinone, Phloretin, Protoanemonin, Salicylic acid, Terebinthone,  
428 Tobramycin, and Withafarin from PubChem database  
429 (<http://www.ncbi.nlm.nih.gov/pccompound>), 3,11,428 compounds from NCI database  
430 (<https://cactus.nci.nih.gov/download/nci/index.html>) and 61,178 compounds from FDA  
431 Approved Drug database were used for *in silico* screening studies.

432

### 433 **Molecular Docking**

434 Crystal structure of StOmpLA was prepared using “protein preparation” wizard of  
435 Schrodinger suite version 2018-3, Licensed to ICGEB, New Delhi, to relieve steric clashes  
436 using the OPLS3e force field<sup>31</sup>. Small molecules were prepared by LigPrep module to expand  
437 protonation and tautomeric states at 7.0±2.0 pH. Grid was generated for the site-1 predicted  
438 and scored by SiteMap. Molecular docking was carried out using Glide.

439

### 440 **MD simulations**

441 System Builder module from Schrodinger’s Maestro was used to set up a POPC membrane  
442 system at 300K. All the systems were constructed using Desmond MD package using

443 OPLS3e force field to calculate the atomic interactions<sup>31</sup>. An orthorhombic box with a box  
444 volume of 2111363 Å<sup>3</sup> with buffer distances of 10 Å on each vertex was used to submerge  
445 the protein or protein-inhibitor complexes. The default simple point charge (SPC) water  
446 model was used with 0.15 M NaCl to neutralize the system. Sequentially, 2000 iterations of  
447 minimization were performed to bring the system into local energy minima with a  
448 convergence threshold of 1 kcal/mol/Å using Desmond. The cut-off radius for the short-range  
449 Coulombic interactions was set to 9 Å. Molecular dynamics simulation was performed on  
450 the relaxed model system at 300 K and 1.01325 bar pressure for 100 ns using NPT ensemble  
451 with the recording interval of 50 ps for trajectory and 1.2 ps for energy by Nose-hoover  
452 thermostat method. Post-processing was done by using Simulation Quality Analysis,  
453 Simulation Event Analysis and Simulation Interaction Diagram tools to analyse the protein  
454 stability using RMSD, RMSF, hydrogen bonding, hydrophobic interactions,  $\pi$ - $\pi$  stacking,  
455 salt-bridge interactions and energy parameters.

456

## 457 **References:**

- 458 1 Homma, H. *et al.* The DNA sequence encoding pldA gene, the structural gene for detergent-  
459 resistant phospholipase A of E. coli. *Journal of biochemistry* **96**, 1655-1664 (1984).
- 460 2 Brok, R. G. *et al.* Molecular characterization of enterobacterial pldA genes encoding outer  
461 membrane phospholipase A. *Journal of bacteriology* **176**, 861-870 (1994).
- 462 3 Horrevoets, A. J., Hackeng, T. M., Verheij, H. M., Dijkman, R. & de Haas, G. H. Kinetic  
463 characterization of Escherichia coli outer membrane phospholipase A using mixed  
464 detergent-lipid micelles. *Biochemistry* **28**, 1139-1147 (1989).
- 465 4 Pugsley, A. P. & Schwartz, M. Colicin E2 release: lysis, leakage or secretion? Possible role of a  
466 phospholipase. *The EMBO journal* **3**, 2393-2397 (1984).
- 467 5 Pullen, J. K., Liang, S. M., Blake, M. S., Mates, S. & Tai, J. Y. Production of Haemophilus  
468 influenzae type-b porin in Escherichia coli and its folding into the trimeric form. *Gene* **152**,  
469 85-88 (1995).
- 470 6 Audet, A., Nantel, G. & Proulx, P. Phospholipase A activity in growing Escherichia coli cells.  
471 *Biochimica et biophysica acta* **348**, 334-343 (1974).
- 472 7 Cronan, J. E., Jr. & Wulff, D. L. A role for phospholipid hydrolysis in the lysis of Escherichia  
473 coli infected with bacteriophage T4. *Virology* **38**, 241-246 (1969).
- 474 8 de Geus, P., van Die, I., Bergmans, H., Tommassen, J. & de Haas, G. Molecular cloning of  
475 pldA, the structural gene for outer membrane phospholipase of E. coli K12. *Molecular &*  
476 *general genetics : MGG* **190**, 150-155 (1983).

- 477 9 Wang, X. *et al.* The outer membrane phospholipase A is essential for membrane integrity  
478 and type III secretion in *Shigella flexneri*. *Open biology* **6**, 160073 (2016).
- 479 10 Schmiel, D. H. & Miller, V. L. Bacterial phospholipases and pathogenesis. *Microbes and*  
480 *infection* **1**, 1103-1112 (1999).
- 481 11 Rosenbusch, J. P. Characterization of the major envelope protein from *Escherichia coli*.  
482 Regular arrangement on the peptidoglycan and unusual dodecyl sulfate binding. *The Journal*  
483 *of biological chemistry* **249**, 8019-8029 (1974).
- 484 12 Tokunaga, M., Tokunaga, H., Okajima, Y. & Nakae, T. Characterization of porins from the  
485 outer membrane of *Salmonella typhimurium*. 2. Physical properties of the functional  
486 oligomeric aggregates. *European journal of biochemistry* **95**, 441-448 (1979).
- 487 13 Park, K., Perczel, A. & Fasman, G. D. Differentiation between transmembrane helices and  
488 peripheral helices by the deconvolution of circular dichroism spectra of membrane proteins.  
489 *Protein science : a publication of the Protein Society* **1**, 1032-1049,  
490 doi:10.1002/pro.5560010809 (1992).
- 491 14 Snijder, H. J. *et al.* Structural evidence for dimerization-regulated activation of an integral  
492 membrane phospholipase. *Nature* **401**, 717-721, doi:10.1038/44890 (1999).
- 493 15 Snijder, H. J. *et al.* Structural investigations of calcium binding and its role in activity and  
494 activation of outer membrane phospholipase A from *Escherichia coli*. *Journal of molecular*  
495 *biology* **309**, 477-489, doi:10.1006/jmbi.2001.4675 (2001).
- 496 16 Emsley, P. & Cowtan, K. Coot: model-building tools for molecular graphics. *Acta*  
497 *crystallographica. Section D, Biological crystallography* **60**, 2126-2132,  
498 doi:10.1107/S0907444904019158 (2004).
- 499 17 Zheng, H. *et al.* Validation of metal-binding sites in macromolecular structures with the  
500 CheckMyMetal web server. *Nature protocols* **9**, 156-170, doi:10.1038/nprot.2013.172  
501 (2014).
- 502 18 Seshadri, K., Garemyr, R., Wallin, E., von Heijne, G. & Elofsson, A. Architecture of beta-barrel  
503 membrane proteins: analysis of trimeric porins. *Protein science : a publication of the Protein*  
504 *Society* **7**, 2026-2032, doi:10.1002/pro.5560070919 (1998).
- 505 19 Ulmschneider, M. B. & Sansom, M. S. Amino acid distributions in integral membrane protein  
506 structures. *Biochimica et biophysica acta* **1512**, 1-14 (2001).
- 507 20 Madhusudan Makwana, K. & Mahalakshmi, R. Implications of aromatic-aromatic  
508 interactions: From protein structures to peptide models. *Protein science : a publication of*  
509 *the Protein Society* **24**, 1920-1933, doi:10.1002/pro.2814 (2015).
- 510 21 Krissinel, E. & Henrick, K. Inference of macromolecular assemblies from crystalline state.  
511 *Journal of molecular biology* **372**, 774-797, doi:10.1016/j.jmb.2007.05.022 (2007).
- 512 22 Russo Krauss, I., Merlino, A., Vergara, A. & Sica, F. An overview of biological macromolecule  
513 crystallization. *International journal of molecular sciences* **14**, 11643-11691,  
514 doi:10.3390/ijms140611643 (2013).
- 515 23 Baaden, M., Meier, C. & Sansom, M. S. A molecular dynamics investigation of mono and  
516 dimeric states of the outer membrane enzyme OMPLA. *Journal of molecular biology* **331**,  
517 177-189 (2003).
- 518 24 Horrevoets, A. J., Verheij, H. M. & de HAAS, G. H. Inactivation of *Escherichia coli*  
519 outer-membrane phospholipase A by the affinity label hexadecanesulfonyl fluoride:  
520 Evidence for an active-site serine. *European journal of biochemistry* **198**, 247-253 (1991).
- 521 25 Balasubramaniam, D., Arockiasamy, A., Kumar, P. D., Sharma, A. & Krishnaswamy, S.  
522 Asymmetric pore occupancy in crystal structure of OmpF porin from *Salmonella typhi*.  
523 *Journal of structural biology* **178**, 233-244, doi:10.1016/j.jsb.2012.04.005 (2012).
- 524 26 Otwinowski, Z. & Minor, W. Processing of X-ray diffraction data collected in oscillation mode.  
525 *Methods in enzymology* **276**, 307-326 (1997).

- 526 27 Long, F., Vagin, A. A., Young, P. & Murshudov, G. N. BALBES: a molecular-replacement  
527 pipeline. *Acta crystallographica. Section D, Biological crystallography* **64**, 125-132,  
528 doi:10.1107/S0907444907050172 (2008).
- 529 28 Murshudov, G. N. *et al.* REFMAC5 for the refinement of macromolecular crystal structures.  
530 *Acta crystallographica. Section D, Biological crystallography* **67**, 355-367,  
531 doi:10.1107/S0907444911001314 (2011).
- 532 29 Winn, M. D. *et al.* Overview of the CCP4 suite and current developments. *Acta*  
533 *crystallographica. Section D, Biological crystallography* **67**, 235-242,  
534 doi:10.1107/S0907444910045749 (2011).
- 535 30 Robert, X. & Gouet, P. Deciphering key features in protein structures with the new ENDscript  
536 server. *Nucleic acids research* **42**, W320-324, doi:10.1093/nar/gku316 (2014).
- 537 31 Harder, E. *et al.* OPLS3: A Force Field Providing Broad Coverage of Drug-like Small Molecules  
538 and Proteins. *Journal of chemical theory and computation* **12**, 281-296,  
539 doi:10.1021/acs.jctc.5b00864 (2016).

540

541

#### 542 **Acknowledgement:**

543 The authors thank Muthusankar Aathi, DST-NPDF, for assistance with *in silico* screening, S.  
544 Krishnaswamy and D. Balasubramnian for critical reading of the manuscript, Bichitrakumar  
545 Biswal, Paul Ravikant, NII, New Delhi for help with X-ray data collection, Amit Kumar and  
546 Manojkumar, Madurai Kamaraj University, for assistance in data collection and processing,  
547 respectively, and Vinod Devaraji, Schrodinger-India for help with MD simulations. SBN lab  
548 is funded by ICMR and Bharathiar University. PP and RR were supported by fellowships  
549 from DST-NPDF (PDF/2016/003347) and CSIR, respectively. Schrodinger suite is supported  
550 by ICGEB core funds. Research in AA lab is funded by ICGEB core funds and grants from  
551 Department of Biotechnology, Govt. of India; BT/PR13735/BRB/10/786/2011 and  
552 BT/PR28080/BID/7/836/2018.

553

#### 554 **Author contribution:**

555 NSB and AA conceived and supervised the work, PP cloned, refolded, purified, and  
556 crystallized StOmpLA. PP, RR and AA collected X-ray data and determined the structure, PP  
557 and RR performed *in silico* studies. All the authors contributed to writing the manuscript.

558

559 **Competing interests:**

560 Authors declare no competing financial and/or non-financial interests in relation to the work  
561 described here.

**Table 1.** Data collection and refinement statistics for StOmpLA (PDB:5DQX)

|                                       |                                     |
|---------------------------------------|-------------------------------------|
| Wavelength Å                          | 1.5418                              |
| Resolution range Å                    | 34.43 - 2.95 (3.055 - 2.95)         |
| Space group                           | P 21 21 21                          |
| Unit cell                             | 79.340, 83.389, 95.463 Å, 90,90,90° |
| No. of images collected               | 155                                 |
| Unique reflections                    | 13771 (1346)                        |
| Multiplicity                          | 2.8                                 |
| Completeness (%)                      | 99.32 (99.41)                       |
| Mean I/sigma(I)                       | 8.54 (2.63)                         |
| Wilson B-factor Å <sup>2</sup>        | 36.33                               |
| R-merge                               | 1.097e-17 (1.118e-17)               |
| R-meas                                | 1.551e-17 (1.581e-17)               |
| R-pim                                 | 1.097e-17 (1.118e-17)               |
| CC1/2                                 | 1 (1)                               |
| CC*                                   | 1 (1)                               |
| Reflections used in refinement        | 13765 (1346)                        |
| Reflections used for R-free           | 685 (67)                            |
| R-work                                | 0.235 (0.238)                       |
| R-free                                | 0.282 (0.289)                       |
| CC (work)                             | 0.897 (0.738)                       |
| CC (free)                             | 0.955 (0.613)                       |
| <b>Number of non-hydrogen atoms</b>   | 4099                                |
| macromolecule                         | 4018                                |
| ligands                               | 63                                  |
| solvent                               | 18                                  |
| Protein residues                      | 504                                 |
| RMS (bonds) Å <sup>2</sup>            | 0.010                               |
| RMS (angles) °                        | 1.44                                |
| Ramachandran favored (%)              | 92.60                               |
| Ramachandran allowed (%)              | 6.00                                |
| Ramachandran outliers (%)             | 1.40                                |
| Rotamer outliers (%)                  | 7.00                                |
| Clash score                           | 6.72                                |
| <b>Average B-factor Å<sup>2</sup></b> | 29.36                               |
| Macromolecule                         | 29.28                               |
| Ligands                               | 35.14                               |
| Solvent                               | 26.08                               |

Statistics for the highest-resolution shell are shown in parentheses.

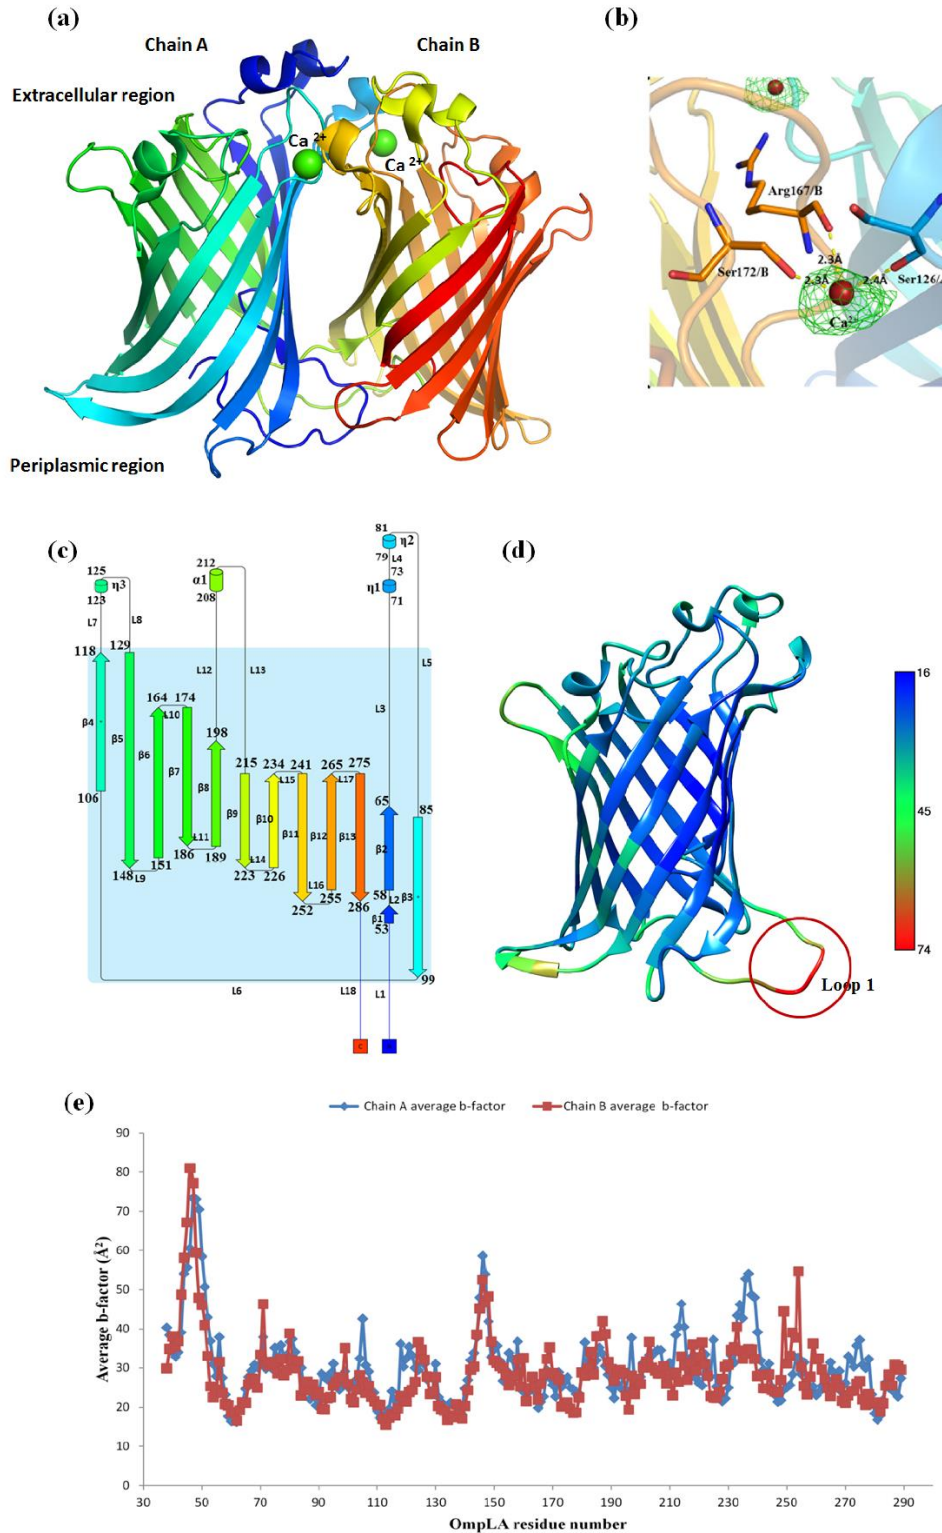

**Figure 1.** Crystal structure analysis of StOmpLA. **(a)** Three dimensional structure of calcium bound dimeric OmpLA, **(b)** Fo-Fc difference map ( $3\sigma$ ) for two calcium ions along with coordination distances of interacting residues S172, R167 and S126, **(c)** Topology of OmpLA along with distribution and placement of 13  $\beta$ -strands, 4  $\alpha$ -helices and 18 loops, **(d)** Average residue-wise temperature factor (Debye-Waller factor). Loop 1 shows highest temperature factor compare to rest of the structure **(e)** Comparison of temperature factors among chain A and B.



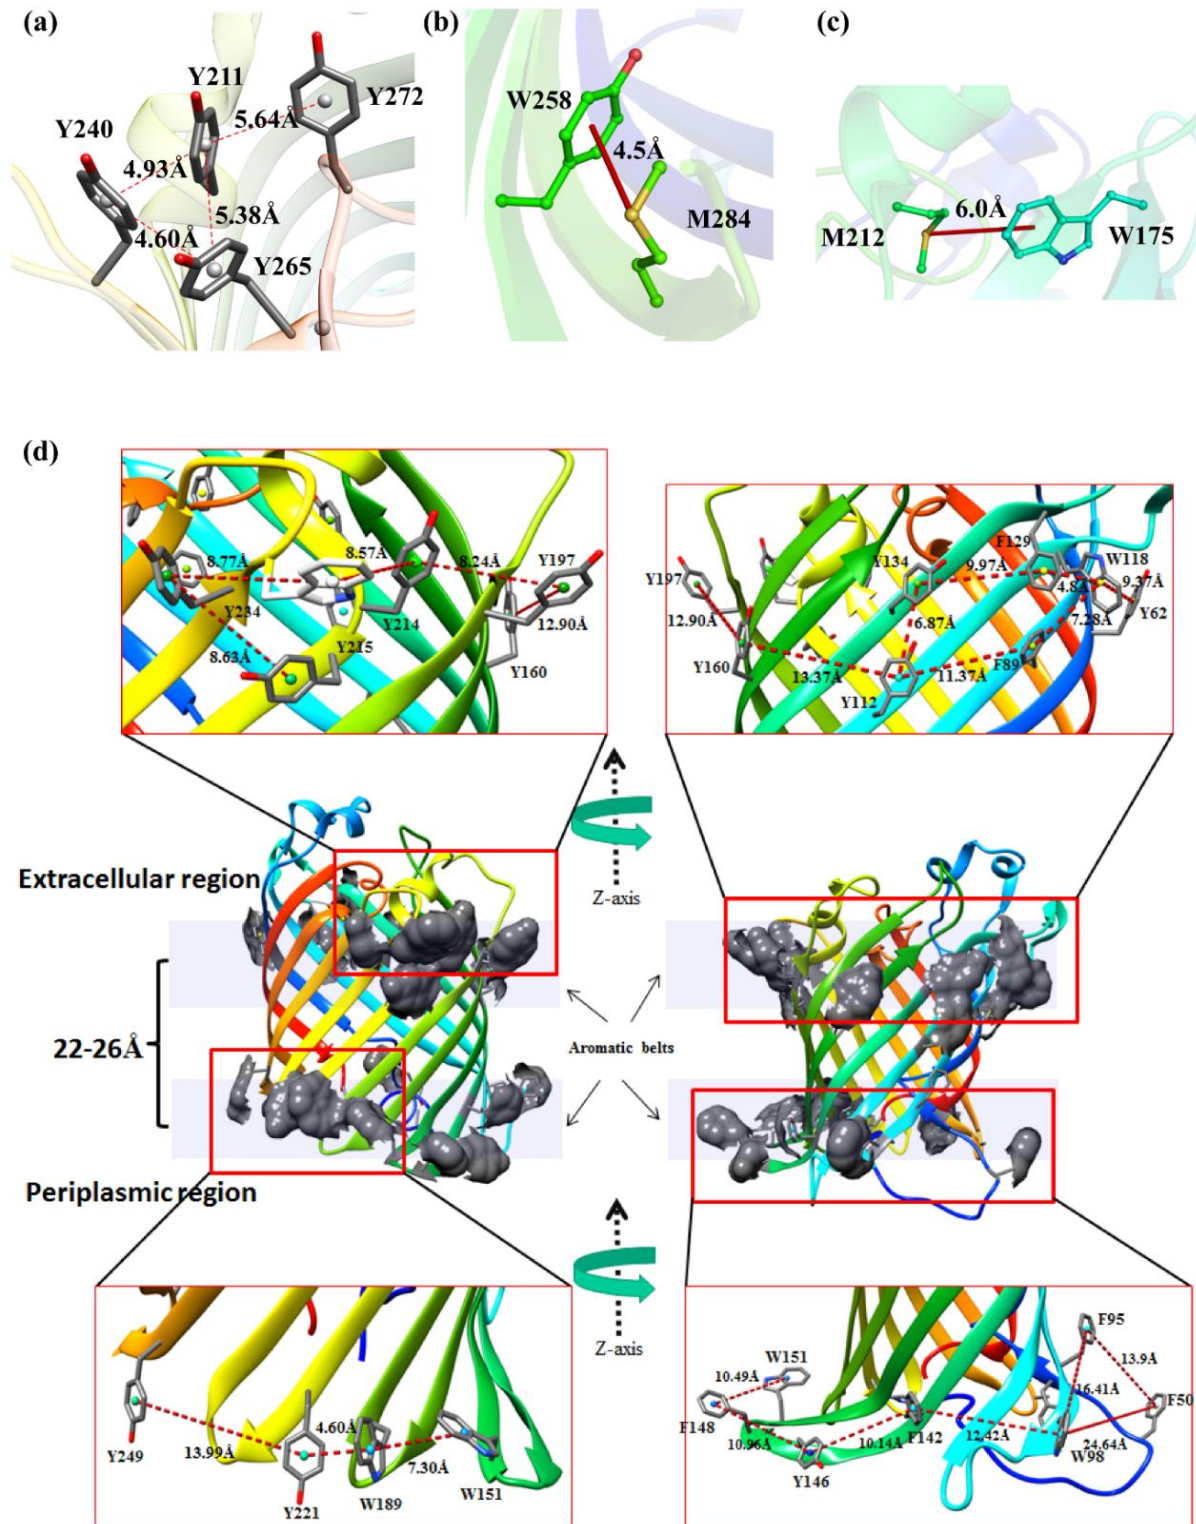

**Figure 2.** Structural features of StOmpLA involving aromatic amino acids. **(a)** Highly ordered aromatic ring cluster at extracellular end of the  $\beta$ -barrel involving Y211, Y240, Y265 and Y272, **(b)** and **(c)** show two sulphur- $\pi$  interaction pairs between M284 and W258, and M212 and W175, respectively. **(d)** Two aromatic belts in OmpLA showing the arrangement of Tyr, Phe and Trp residues along periphery of  $\beta$ -barrel and distances between them are shown.

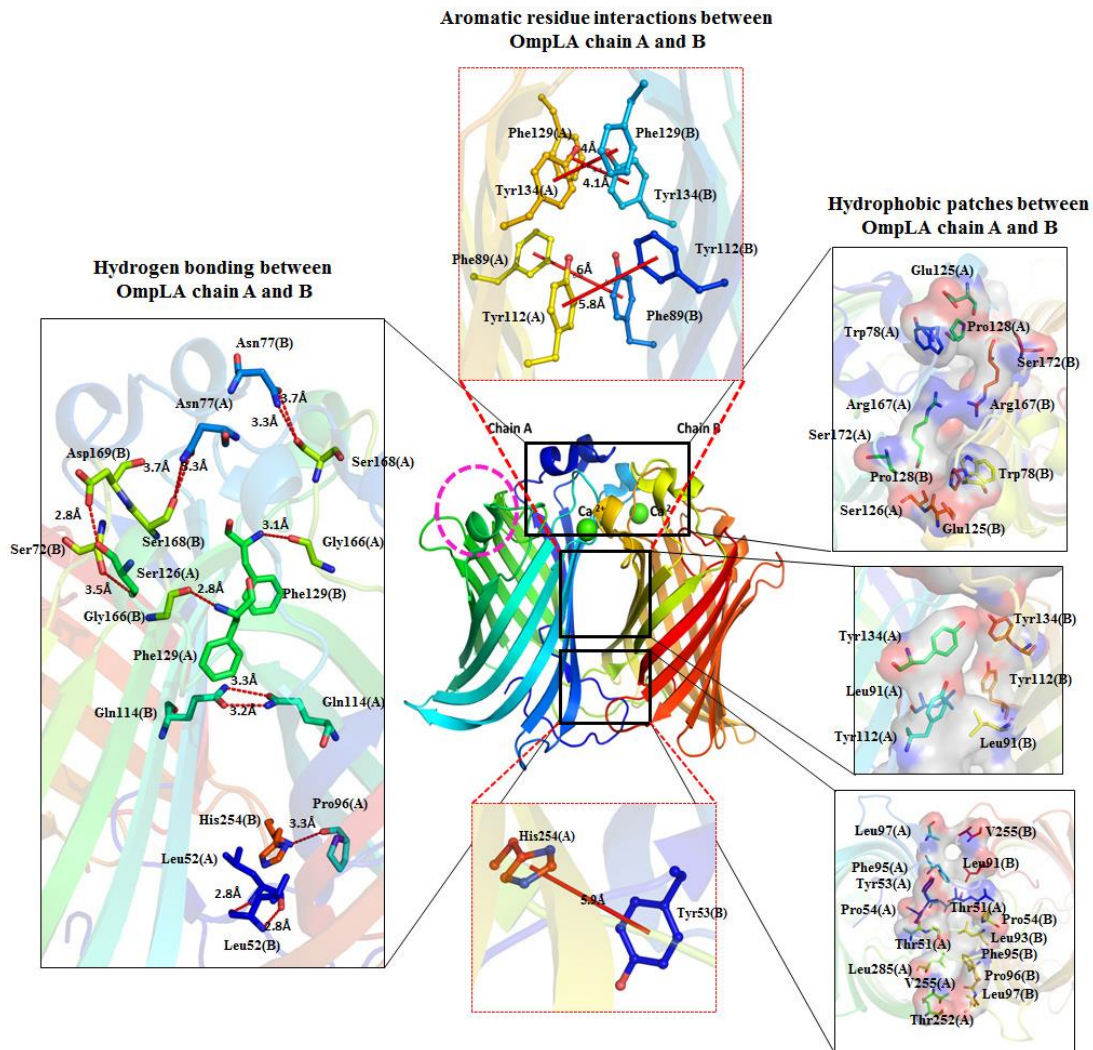

**Figure 3.** Structural analysis of OmpLA dimer interface. Left panel shows hydrogen bonding between two OmpLA chains, central panel shows aromatic ring interactions and right insets show the residues forming hydrophobic patches between two chains.

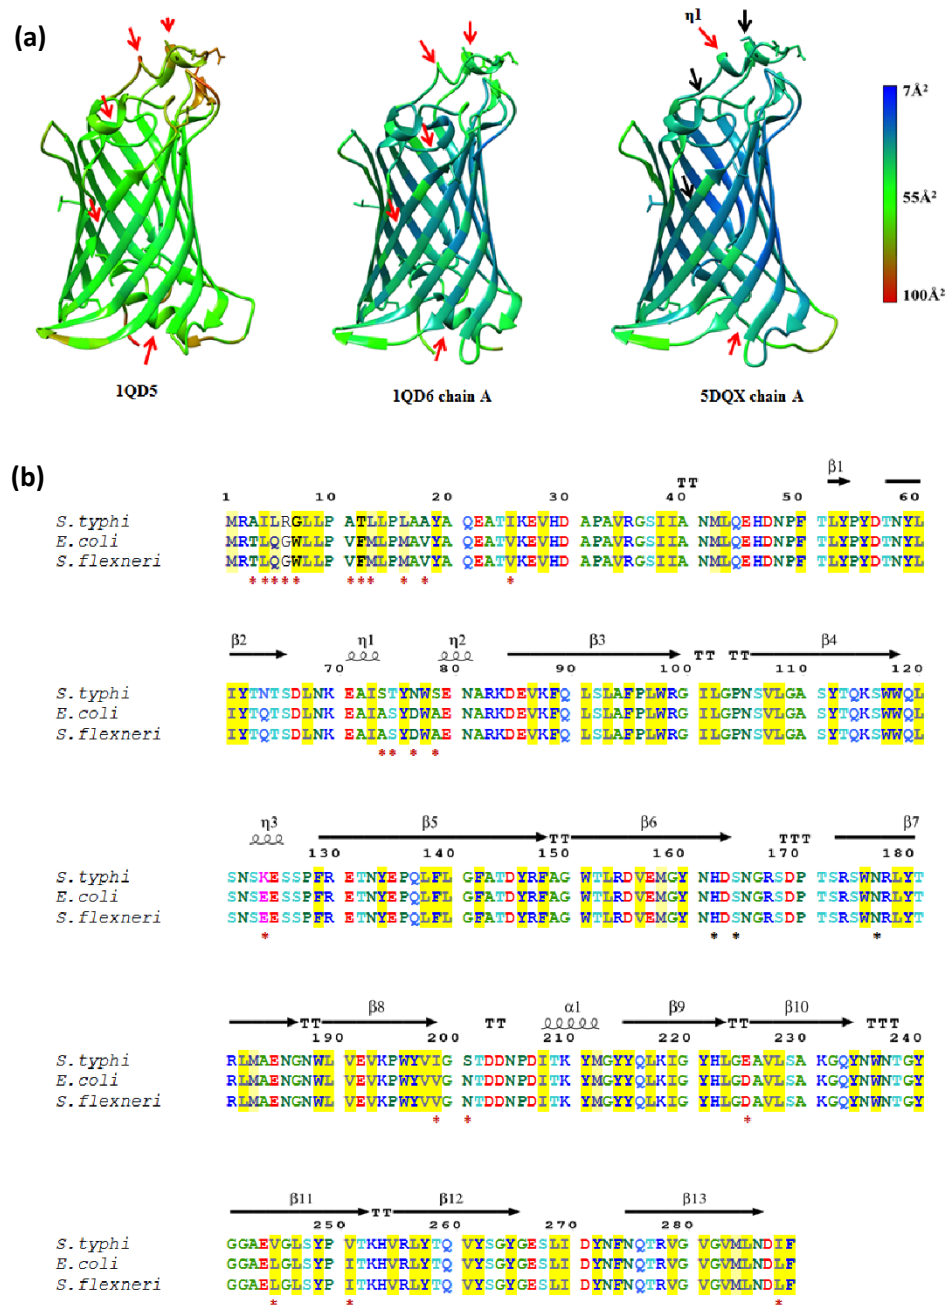

**Figure 4.** Comparison of crystal structures of OmpLA from *E. coli* (PDB:1QD5, 1QD6) and *S. typhi* (PDB:5DQX). (a) Temperature factor variation among monomeric and dimeric forms of OmpLA, (b) Structure based sequence alignment of OmpLA from *S. typhi*, *E. coli* and *S. flexneri*. Alignment is coloured based on 85% consensus using the following scheme: hydrophobic (ACFILMVWY), aliphatic (ILV) and aromatic (FHWY) residues shaded yellow; polar residues (CDEHKNQRST) are shaded blue; small (ACDGNPSTV) and tiny (AGS) residues shaded green; and big (QRKEILMWYF) residues shaded grey. OH group (ST) containing residues are shaded orange. Variations at the amino acid residue level are marked by red asterisk below them, and proposed active site residues of StOmpLA (162, 164 and 176) are marked by black asterisk. Red and black arrows indicate regions of higher and lower B-factors, respectively. Overall, StOmpLA has lower B-factors compare to monomeric and dimeric EcOmpLA.

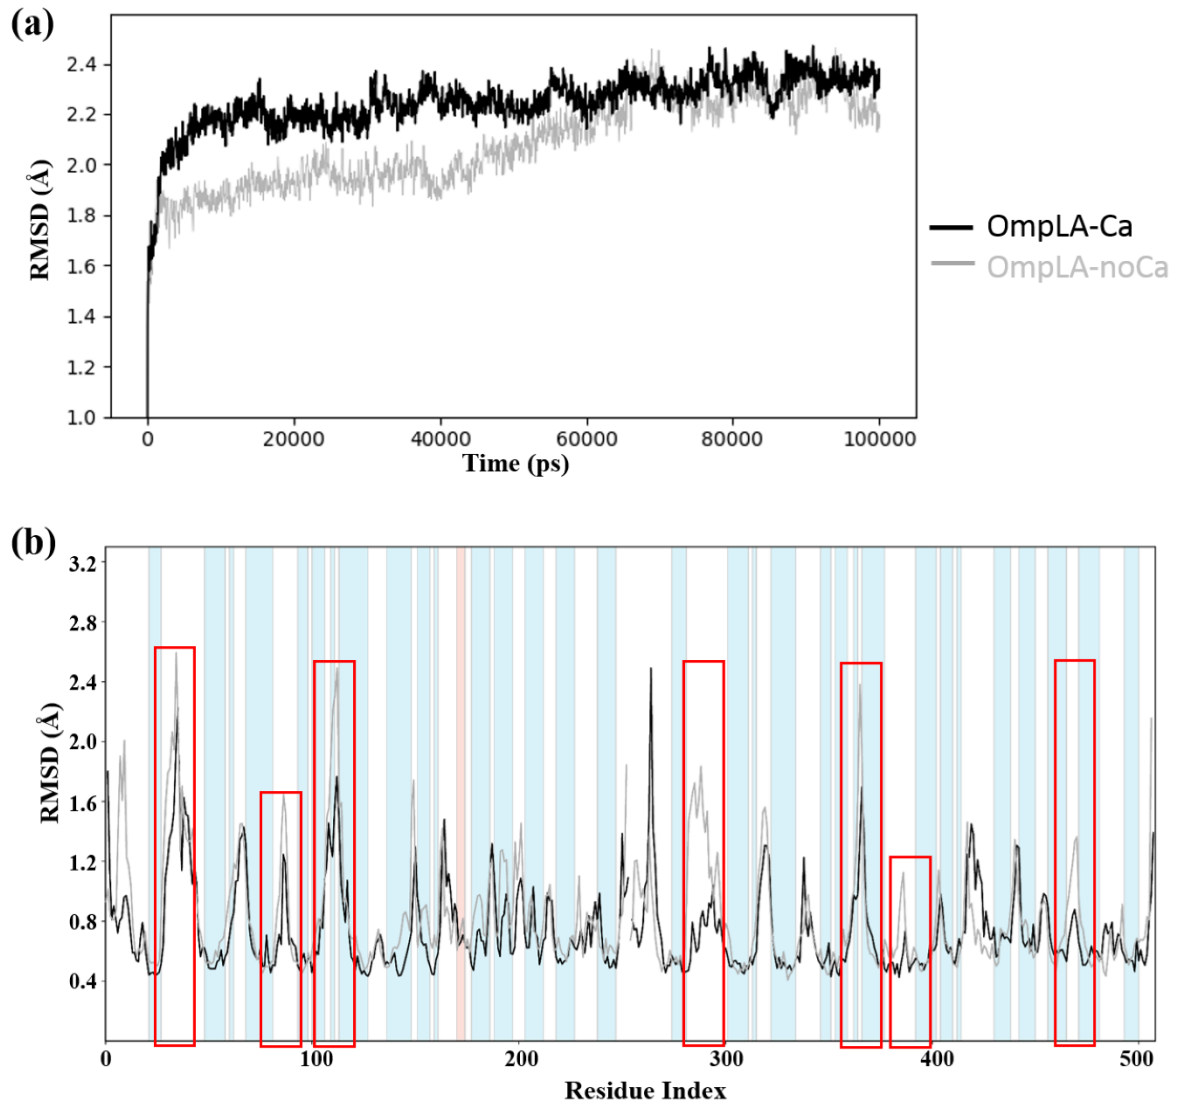

**Figure 5.** Molecular dynamics analysis StOmpLA. **(a)** Comparative structural stability analysis of OmpLA with and without  $\text{Ca}^{2+}$ , black and grey lines respectively, subjected to 100 ns simulation and corresponding RMSF comparison **(b)**. Regions with high variations are marked by red boxes.

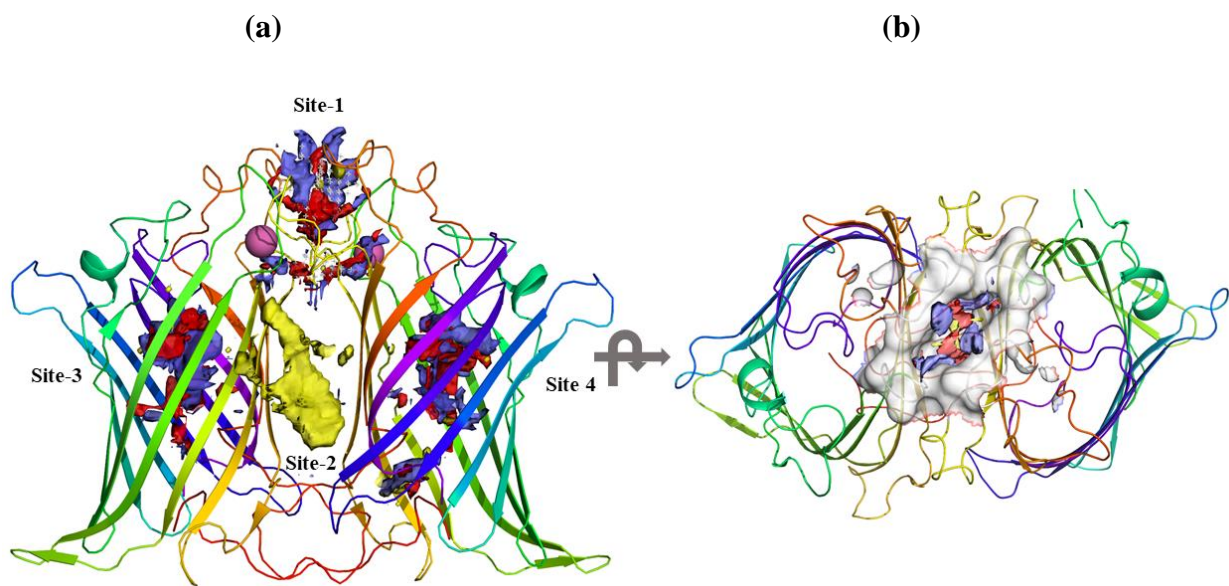

**Figure 6.** Druggable binding pockets in stOmpLA predicted using SiteMap (Schrodinger). **(a)** Out of the five sites predicted, only four are shown here. Site-2, made of mostly flat and hydrophobic, has an equivalent site on opposite side of the dimer, not shown here, **(b)** Site-1 seen from the extracellular space, towards periplasmic side. Druggable pocket characteristics are color coded differently: Hydrogen donor; blue, Hydrogen acceptor; red, Hydrophobic; yellow.

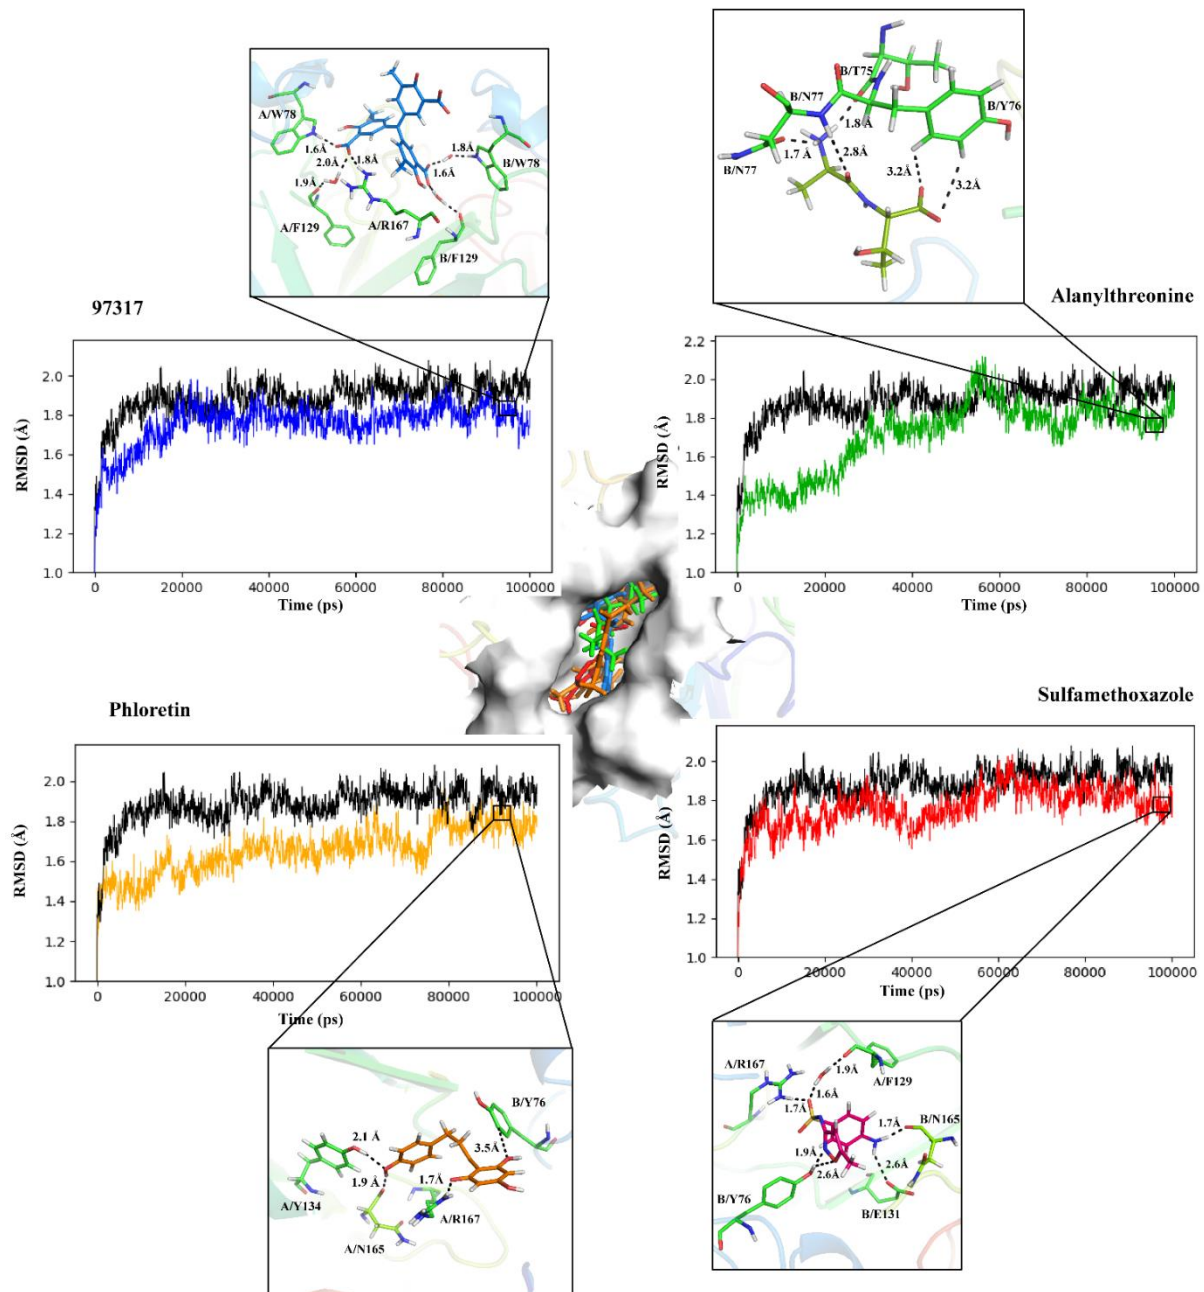

**Figure 7.** Molecular dynamics simulation analysis of OmpLA-inhibitor complexes docked *in silico*. Docking of top three hits and a known antibiotic Sulfamethoxazole at the site-1 are shown at the centre. RMSD trajectories for all four complexes, in comparison to native protein are shown. Representative hydrogen bonding pattern is shown, as insets, for each OmpLA-small molecule complex for most stable trajectory region on the RMSD plots.
